# Supplementary material for: HSP27 inhibitor attenuates radiation-induced pulmonary inflammation
Source: PubMed Central journal article supplement (PMC5843649; doi:10.1038/s41598-018-22635-9), 2018-03-08
Supplement: 41598_2018_22635_MOESM1_ESM.pdf [file 41598_2018_22635_MOESM1_ESM.pdf]

## Supplementary Information

### Title : HSP27 inhibitor attenuates radiation-induced pulmonary inflammation

Jee-Youn Kim<sup>1</sup>, Yong-Min An<sup>1</sup>, Byeong Rok Yoo<sup>1</sup>, Jin-Mo Kim<sup>1</sup>, Song Yee Han<sup>1</sup>, Younghwa Na<sup>2\*</sup>, Yun-Sil Lee<sup>3\*</sup>, Jaeho Cho<sup>1\*</sup>

#### Supplementary Table S1.

##### The parameter description using the flexiVent™ system measurements

| Parameter               | Abbreviations | Description                                                                                                                                                             |
|-------------------------|---------------|-------------------------------------------------------------------------------------------------------------------------------------------------------------------------|
| Inspiratory Capacity    | IC            | IC is the volume difference between functional residual capacity (FRC) and total lung capacity (TLC),<br>Also equaling tidal volume plus the inspiratory reserve volume |
| Quasi-static Compliance | Cst           | The parameter K of the Salazar-Knowles equation reflects the curvature of the upper portion                                                                             |
| Tissue Damping          | G             | Tissue damping is closely related to tissue resistance and reflects the energy dissipation in the lung tissues.                                                         |
| Tissue Elastance        | H             | The parameter H is closely related to tissue elastance and reflects the energy conservation in the lung tissues.                                                        |
| Newtonian Resistance    | Rn            | The Newtonian Resistance parameter of the Constant Phase Model represents the resistance of the central<br>airway.                                                      |
| Airway constriction     | Rrs           | Resistance of the respiratory system                                                                                                                                    |

**Supplementary Table S2.**

**The sequence of the primers used for real-time PCR**

| <b>Genes</b> | <b>Forward (5'-3')</b> | <b>Reverse (5'-3')</b> |
|--------------|------------------------|------------------------|
| TGF- $\beta$ | AGCGGACTACTATGCTAAAG   | CCAAGGTAACGCCAGGAATT   |
| IL-6         | CCGGAGAGGAGACTTCACA    | TCCACGATTTCCCAGAGAAC   |
| IL-1b        | GCCCATCCTCTGTGACTCAT   | AGGCCACAGGTATTTTGTCG   |
| IL-33        | ATTCCCCGGCAAAGTTCAG    | AACGGAGTCTCATGCAGTAG   |
| MIP-1a       | ATGAAGGTCTCCACCACTGC   | GATGAATTGGCGTGGAATCT   |
| CCL-4        | CCCACTTCCTGCTGTTTCTC   | GTCTGCCTCTTTTGGTCAGG   |
| NLRP3        | TGCTCTTCACTGCTATCAAG   | ACAAGCCTTTGCTCCAGACCC  |
| IL-18        | GTGAACCCCAGACCAGACTG   | CCTGGAACACGTTTCTGAAA   |
| Caspase-1    | TCCGCGGTTGAATCCTTTTCA  | ACCACAATTGCTGTGTGTGCG  |

Supplementary Figure S1

**A**

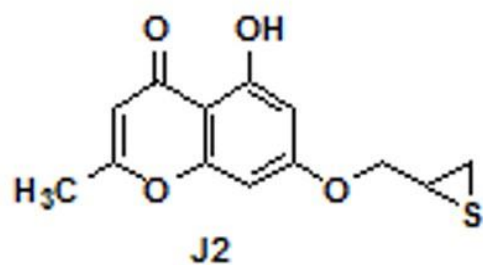

**B**

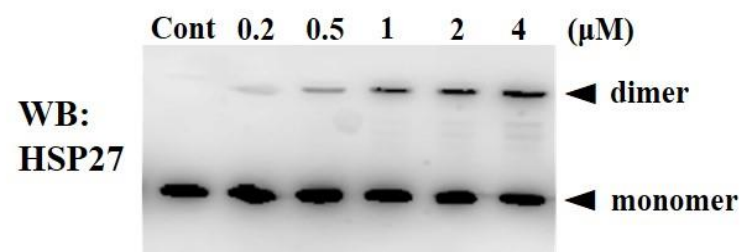

**Fig. S1. J2 structure and HSP27 cross-linking activities of J2.** (A) J2 structure. (B) HSP27 cross-linking activities of J2.

J2 was treated at each concentration for 24h in L132 cells. Western blots shows the expression of monomer and dimer form of HSP27.

## Supplementary Figure S2

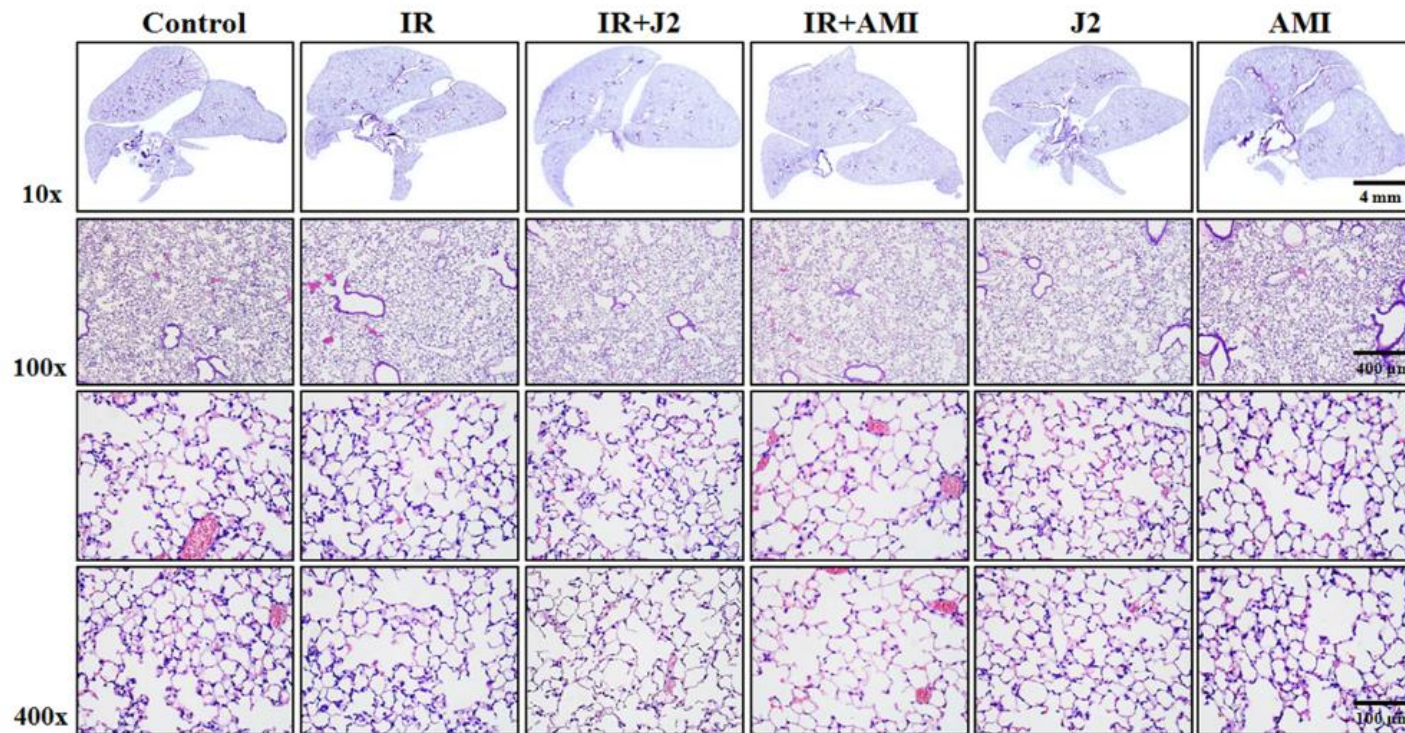

**Fig. S2. Histological analysis in the right lung sections from the left lung-irradiated mice.** Mice were sacrificed at 2 weeks after irradiation. Lung tissues were fixed in 4% paraformaldehyde and then dehydrated and embedded in paraffin. For histological study, 4 μm tissue sections were stained with haematoxylin and eosin (H & E), Magnification, 10x, 100x and 400x.

### Supplementary Figure S3

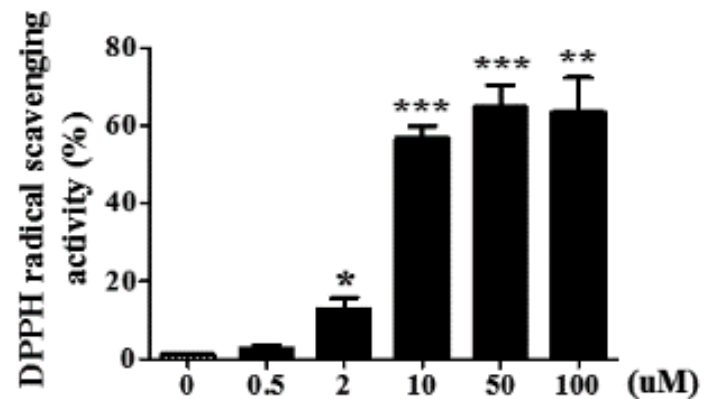

**Fig. S3. Effect of J2 on DPPH radical scavenging activity.** J2 exhibited radical scavenging activity in relatively dose-dependent manner. The values are expressed as mean  $\pm$  SD of data from three independent assays (\* $P < 0.05$ , \*\* $P < 0.01$  and \*\*\* $P < 0.001$  versus 0).

## Supplementary Figure S4

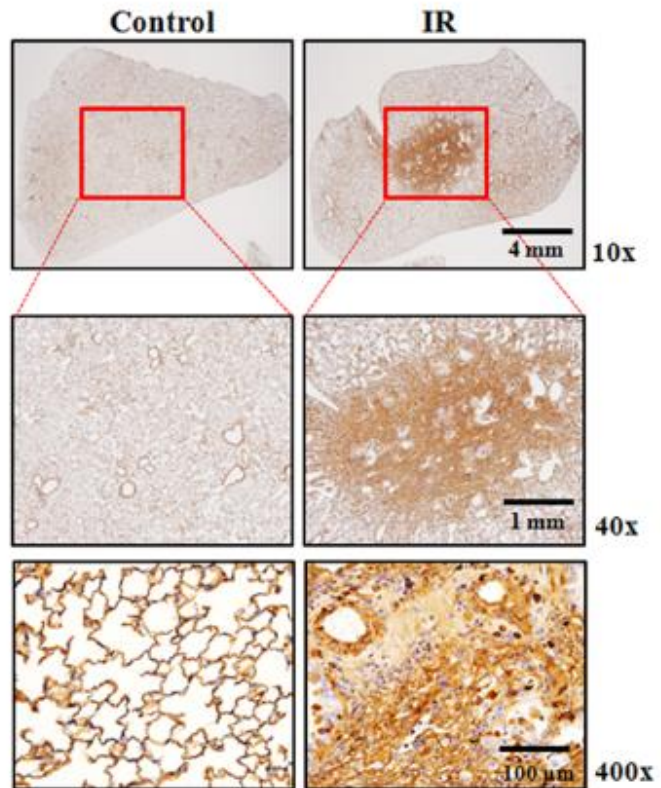

**Fig. S4. HSP27 expression level after irradiation.** Immunohistochemistry of HSP27 was performed in mouse lung tissues after focal 75 Gy irradiation (IR). HSP27 expression was dramatically increased by irradiation.

## Supplementary Figure S5

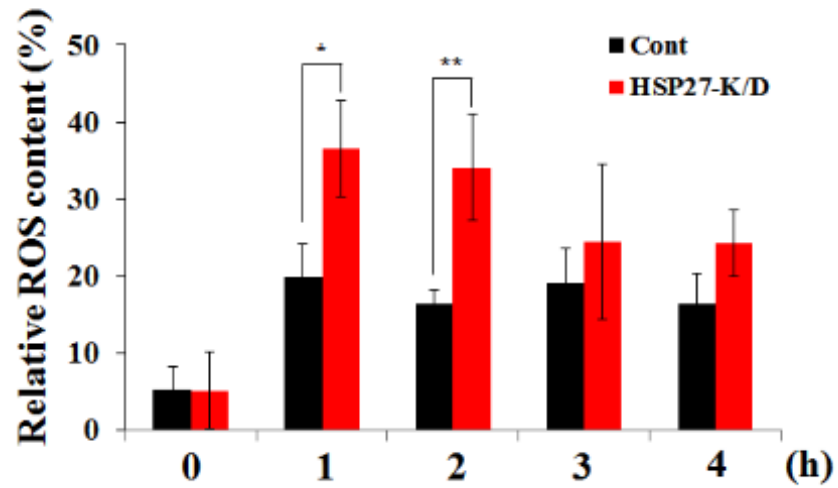

**Fig. S5. Intracellular ROS generation by radiation between J2-treated cells and sh-HSP27 cells.** Sh-control and sh-HSP27 cells treated with X-rays at 10 Gy for 0, 1, 2, 3 or 4 h, Cells were stained with DCF-DA and subjected to flow cytometric analysis.
